# Supplementary material for: Functional analysis of Salmonella Typhi adaptation to survival in water
Source: PubMed Central journal article supplement (PMC6282856; doi:10.1111/1462-2920.14458), 2018-11-18

Metabolic pathway overview

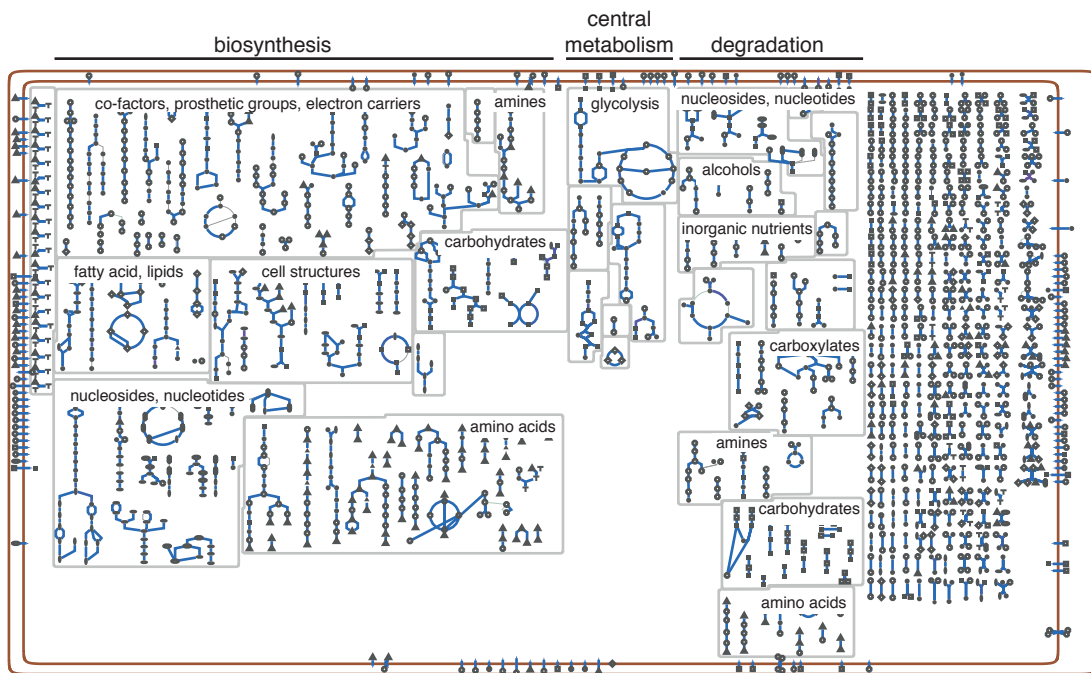

30 minutes

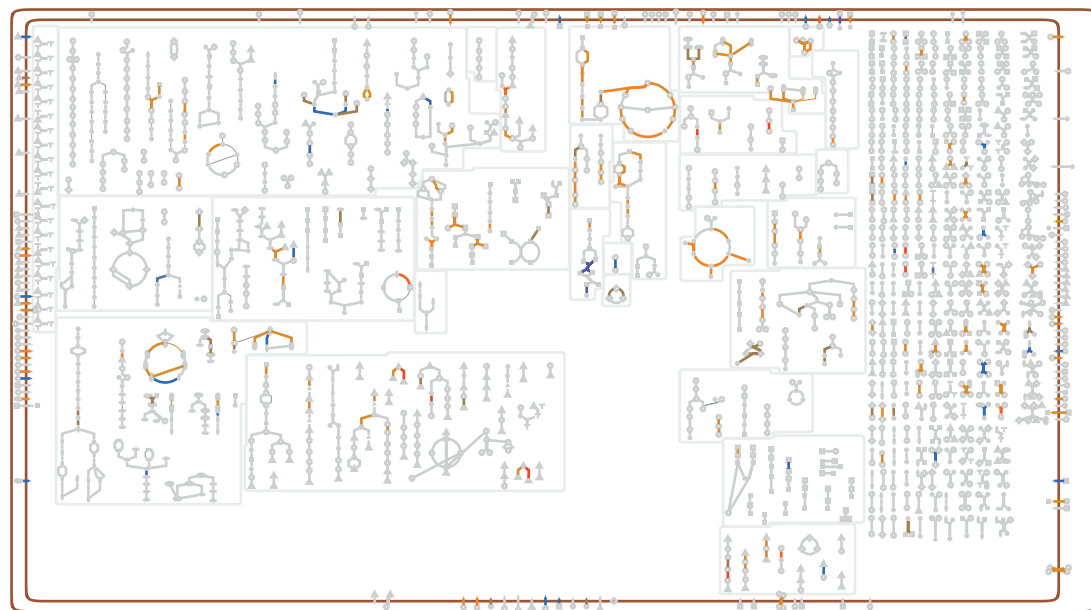

6 hours

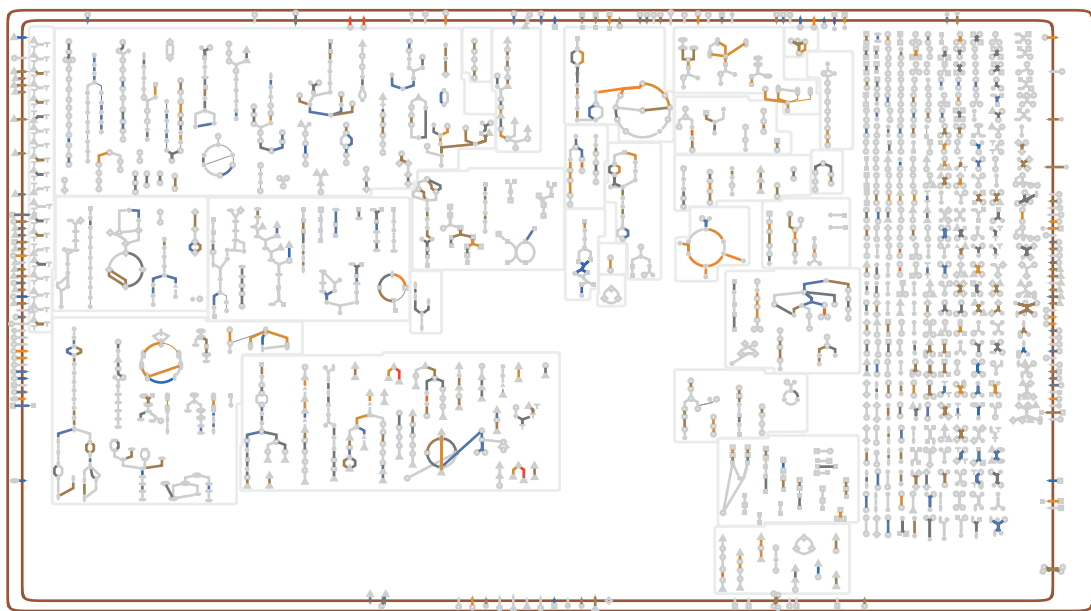

24 hours

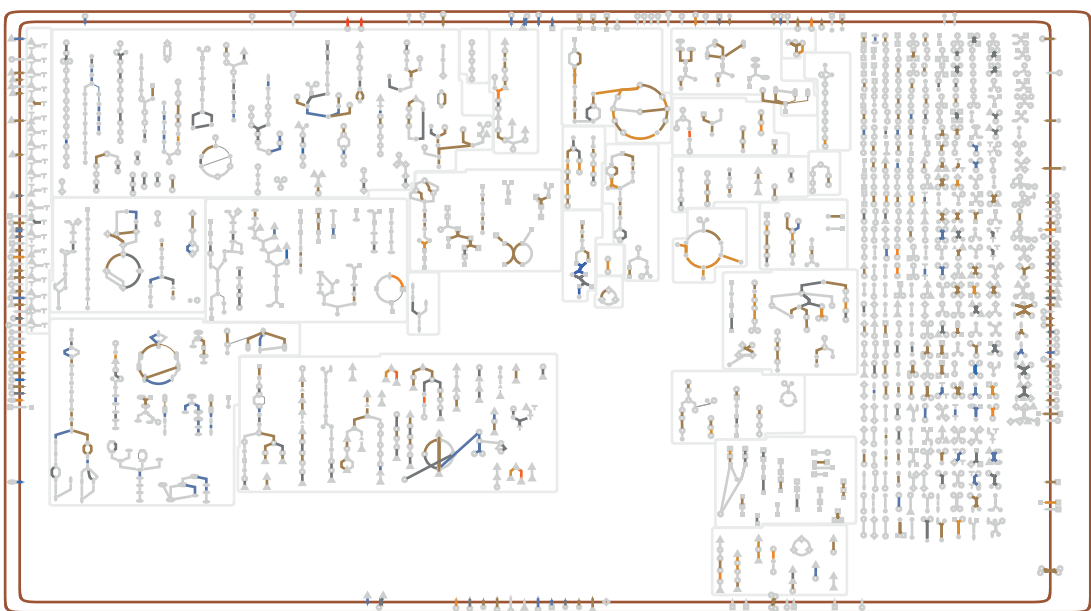

Essential genes

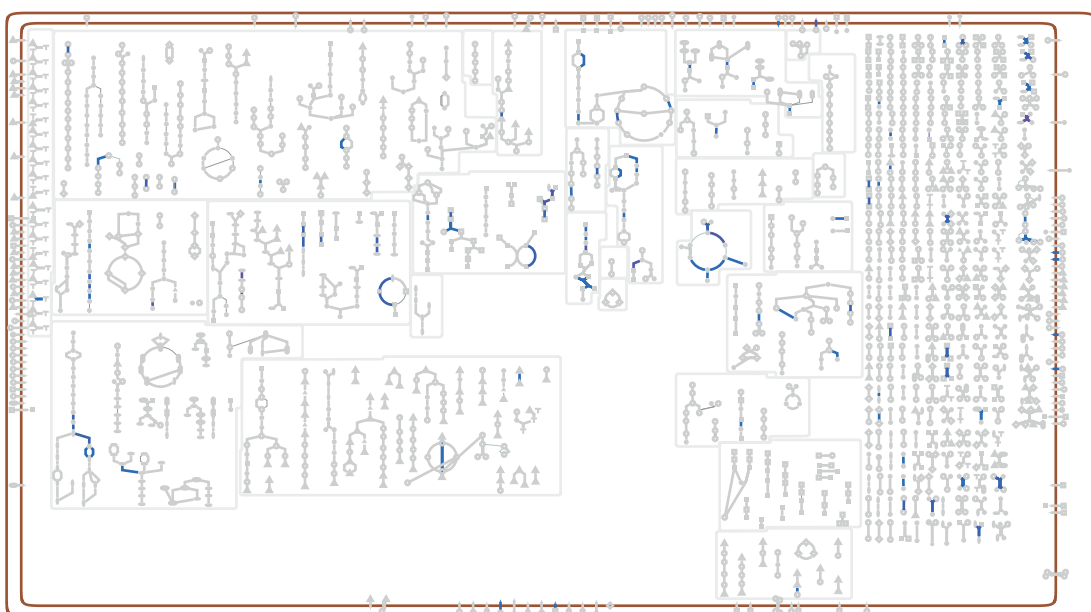

Supplement: EMI-20-4079-s001.pdf [file EMI-20-4079-s001.pdf]
